# Supplementary material for: Prognostic Significance of Preoperative Systemic Cellular Inflammatory Markers in Gliomas: A Systematic Review and Meta‐Analysis
Source: PubMed Central journal article supplement — Clin Transl Sci. 2019 Oct 30;13(1):179–88. doi: 10.1111/cts.12700 (PMC6951460; doi:10.1111/cts.12700), 2019-10-30

## Supplementary Material

Table S1. Search Algorithm

Figure S1. Subgroup analysis of NLR

Figure S2. Subgroup analysis of PLR

**Table S1. Search Algorithm**

**PUBMED**

| # | Searches                                                                                                                                                                                                                                                                                                                                                                   | Results |
|---|----------------------------------------------------------------------------------------------------------------------------------------------------------------------------------------------------------------------------------------------------------------------------------------------------------------------------------------------------------------------------|---------|
| 1 | Search (((((((((((((prognosis[MeSH Terms]) OR prognostic indices) OR prognostic index) OR prognostic role) OR prognostic biomarker) OR prognostic significance) OR prognostic score) OR prognostic factor) OR survival analysis[MeSH Terms]) OR overall survival) OR OS) OR progression-free survival) OR PFS) OR recurrence free survival) OR RFS) OR hazard ratio) OR HR | 3213677 |
| 2 | Search (((((((((((((inflammatory marker) OR inflammatory index) OR systemic inflammatory) OR neutrophil lymphocyte ratio) OR NLR) OR lymphocyte monocyte ratio) OR LMR) OR platelet lymphocyte ratio) OR PLR) OR prognostic nutritional index) OR PNI) OR red cell distribution width) OR RDW) OR C-reactive protein) OR CRP                                               | 276988  |
| 3 | Search (((((((((((((glioma[MeSH Terms]) OR glioblastoma) OR grade glioma) OR malignant glioma) OR glioma prognosis) OR glial cell tumor) OR glial cell mixed glioma) OR mixed glioma) OR malignant gliomas) OR high grade glioma) OR diffuse intrinsic pontine glioma) OR glioblastomas) OR GBM                                                                            | 103396  |
| 4 | Search #1 AND #2 AND #3 Filters: Humans                                                                                                                                                                                                                                                                                                                                    | 151     |

**EMBASE**

| # | Searches                                                                                                                                                                                                                                                                                                                             | Results |
|---|--------------------------------------------------------------------------------------------------------------------------------------------------------------------------------------------------------------------------------------------------------------------------------------------------------------------------------------|---------|
| 1 | exp prognosis/ or (prognostic indices or prognostic index or prognostic role or prognostic biomarker or prognostic significance or prognostic score or prognostic factor).af. or exp survival analysis/ or (overall survival or OS or progression-free survival or PFS or recurrence free survival or RFS or hazard ratio or HR).af. | 1472666 |
| 2 | (inflammatory marker or inflammatory index or systemic inflammatory or neutrophil lymphocyte ratio or NLR or lymphocyte monocyte ratio or LMR or platelet lymphocyte ratio or PLR or prognostic nutritional index or PNI or red cell distribution width or RDW or C-reactive protein or CRP).af.                                     | 232535  |
| 3 | exp glioma/ or (glioblastoma or grade glioma or malignant glioma or glioma prognosis or glial cell tumor or glial cell mixed glioma or mixed glioma or malignant gliomas or high grade glioma or diffuse intrinsic pontine glioma or glioblastomas or GBM).af.                                                                       | 138159  |
| 4 | limit 3 to human                                                                                                                                                                                                                                                                                                                     | 110614  |
| 5 | 1 and 2 and 4                                                                                                                                                                                                                                                                                                                        | 112     |

**Cochrane**

| # | Searches                                                                                                                                                                                                                                                                                                                                                                                                                                                               | Results |
|---|------------------------------------------------------------------------------------------------------------------------------------------------------------------------------------------------------------------------------------------------------------------------------------------------------------------------------------------------------------------------------------------------------------------------------------------------------------------------|---------|
| 1 | MeSH descriptor: [Prognosis] explode all trees or (prognostic indices or prognostic index or prognostic role or prognostic biomarker or prognostic significance or prognostic score or prognostic factor) (Word variations have been searched) or MeSH descriptor: [Survival Analysis] explode all trees or (overall survival or OS or progression-free survival or PFS or recurrence free survival or RFS or hazard ratio or HR) (Word variations have been searched) | 227955  |
| 2 | (inflammatory marker or inflammatory index or systemic inflammatory or neutrophil lymphocyte ratio or NLR or lymphocyte monocyte ratio or LMR or platelet lymphocyte ratio or PLR or prognostic nutritional index or PNI or red cell distribution width or RDW or C-reactive protein or CRP) (Word variations have been searched)                                                                                                                                      | 29583   |
| 3 | MeSH descriptor: [Glioma] explode all trees or (glioblastoma or grade glioma or malignant glioma or glioma prognosis or glial cell tumor or glial cell mixed glioma or mixed glioma or malignant gliomas or high grade glioma or diffuse intrinsic pontine glioma or glioblastomas or GBM) (Word variations have been searched)                                                                                                                                        | 2562    |
| 4 | 1 and 2 and 3                                                                                                                                                                                                                                                                                                                                                                                                                                                          | 23      |

**Web of Science**

| # | Searches                                                                                                                                                                                                                                                                                                                                                                                                                                        | Results |
|---|-------------------------------------------------------------------------------------------------------------------------------------------------------------------------------------------------------------------------------------------------------------------------------------------------------------------------------------------------------------------------------------------------------------------------------------------------|---------|
| 1 | TOPIC: (prognosis OR prognostic indices OR prognostic index OR prognostic role OR prognostic biomarker OR prognostic significance OR prognostic score OR prognostic factor OR survival analysis OR overall survival OR OS OR progression-free survival OR PFS OR recurrence free survival OR RFS OR hazard ratio OR HR)<br><br>Indexes=SCI-EXPANDED, SSCI, A&HCI, CPCI-S, CPCI-SSH, BKCI-S, BKCI-SSH, ESCI, CCR-EXPANDED, IC Timespan=All years | 1093651 |
| 2 | TOPIC: (inflammatory marker OR inflammatory index OR systemic inflammatory OR neutrophil lymphocyte ratio OR NLR OR lymphocyte monocyte ratio OR LMR OR platelet lymphocyte ratio OR PLR OR prognostic nutritional index OR PNI OR red cell distribution width OR RDW OR C-reactive protein OR CRP)<br><br>Indexes=SCI-EXPANDED, SSCI, A&HCI, CPCI-S, CPCI-SSH, BKCI-S, BKCI-SSH, ESCI, CCR-EXPANDED, IC Timespan=All years                     | 235006  |
| 3 | TOPIC: (glioma OR glioblastoma OR grade glioma OR malignant glioma OR glioma prognosis OR glial cell tumor OR glial cell mixed glioma OR mixed glioma OR malignant gliomas OR high grade glioma OR diffuse intrinsic pontine glioma OR glioblastomas OR GBM)<br><br>Indexes=SCI-EXPANDED, SSCI, A&HCI, CPCI-S, CPCI-SSH, BKCI-S, BKCI-SSH, ESCI, CCR-EXPANDED, IC Timespan=All years                                                            | 105509  |
| 4 | #1 AND #2 AND #3<br><br>Indexes=SCI-EXPANDED, SSCI, A&HCI, CPCI-S, CPCI-SSH, ESCI Timespan=All years                                                                                                                                                                                                                                                                                                                                            | 142     |

**Figure S1.** The pooled hazard ratio (HR) of neutrophil/lymphocyte ratio (NLR) for overall survival (OS) in glioma patients: subgroup analysis of (A) region; (B) cut-off value; (C) adjustment of HR; (D) glioma grade; (E) treatment; random-effects model.

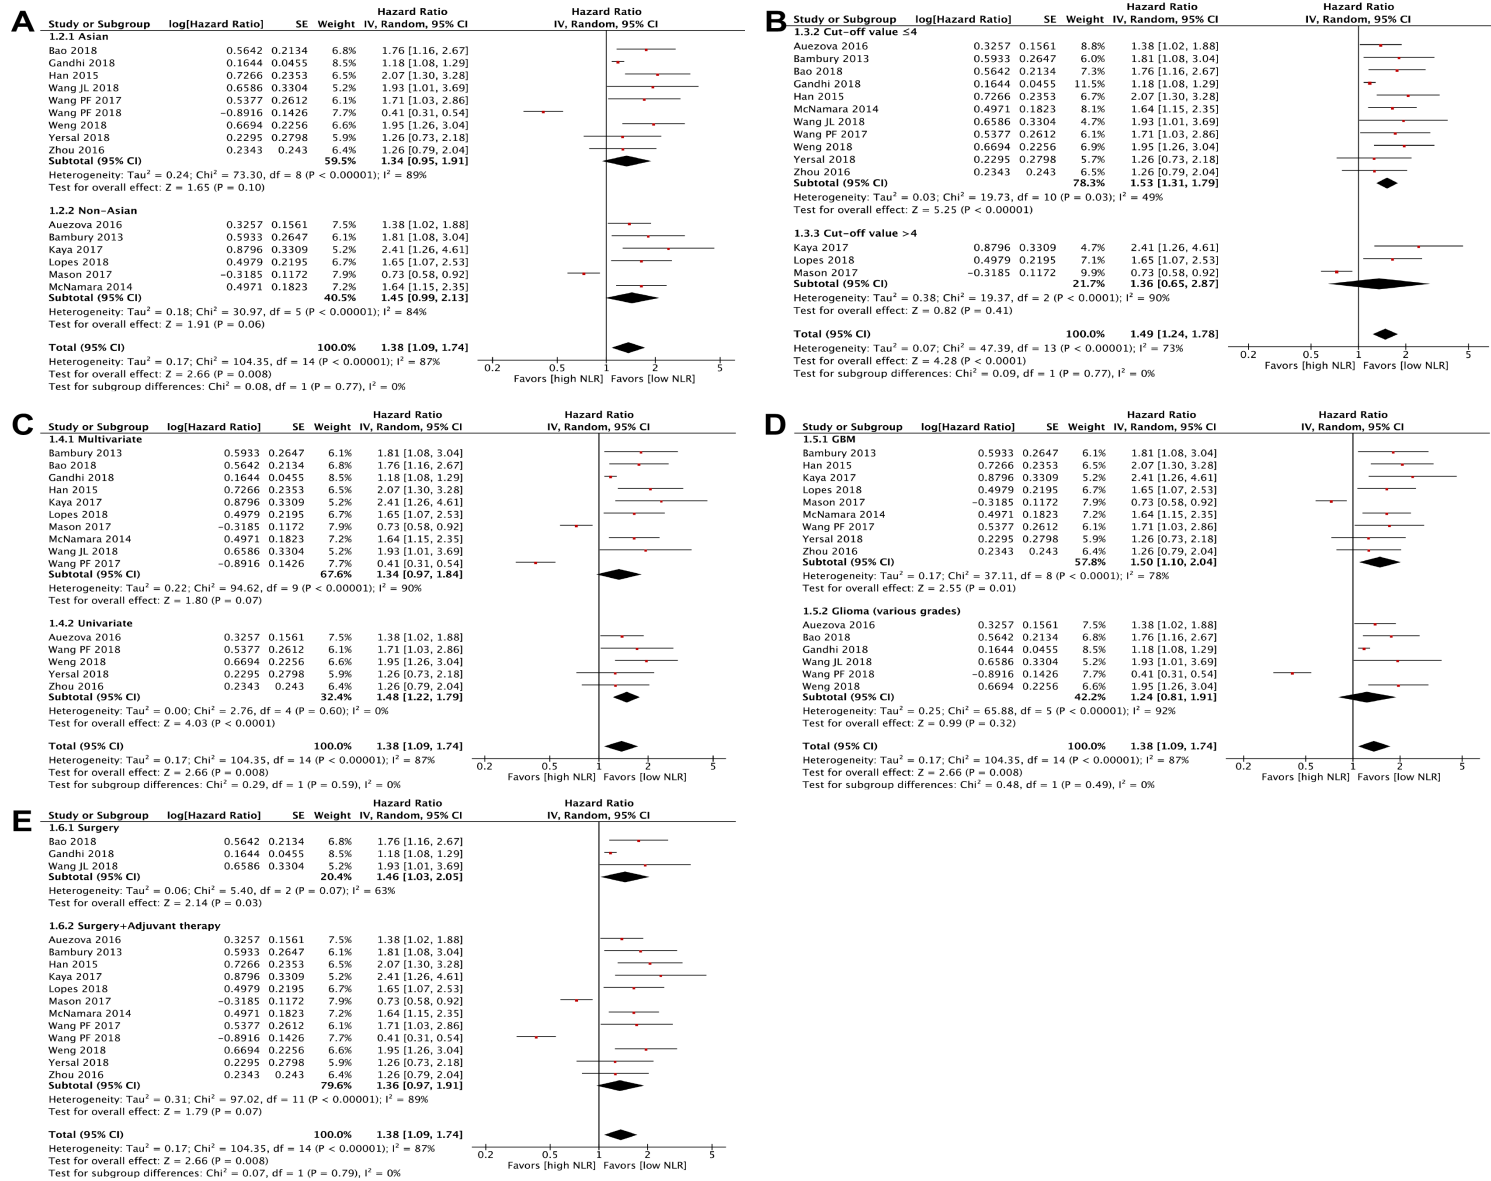

**Figure S2.** The pooled hazard ratio (HR) of platelet/lymphocyte ratio (PLR) for overall survival (OS) in glioma patients: subgroup analysis of (A) region; (B) cut-off value; (C) adjustment of HR; (D) glioma grade; (E) treatment; random-effects model.

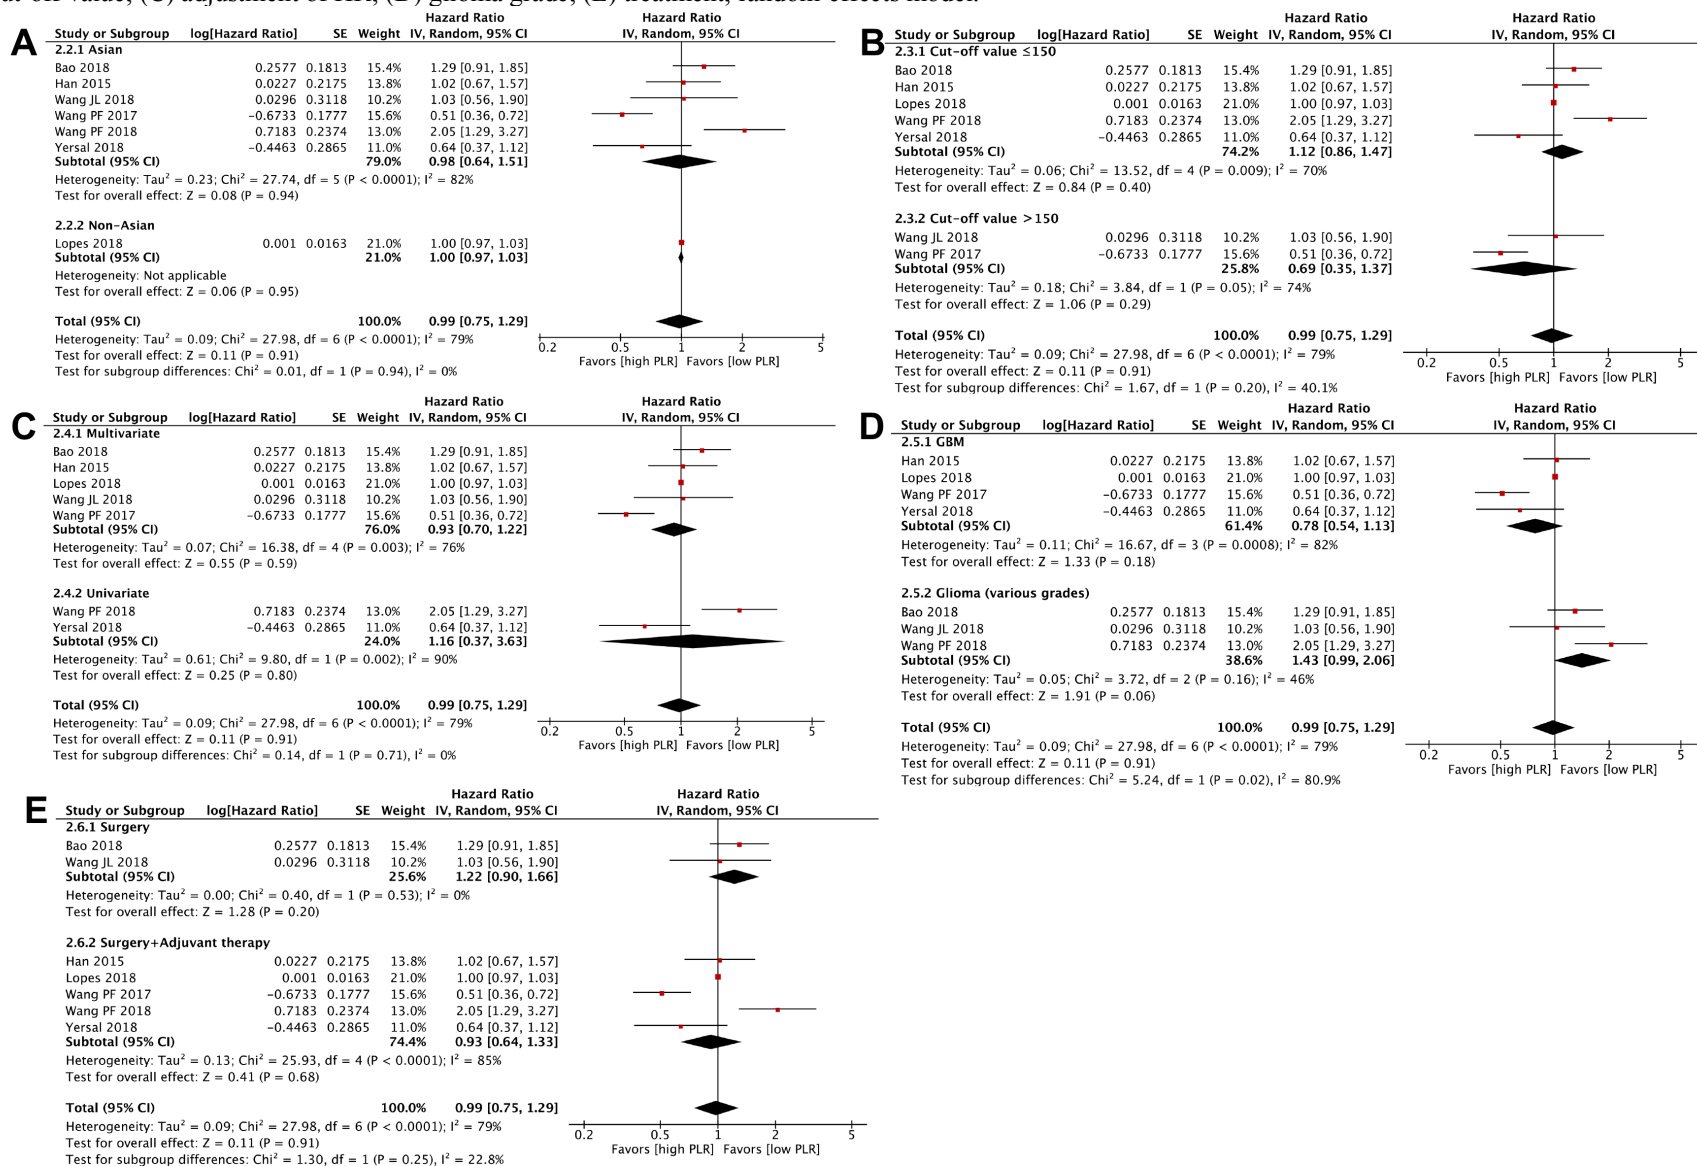

Supplement: CTS-13-179-s001.pdf [file CTS-13-179-s001.pdf]
